# Supplementary material for: Decrease in the Size of Fat-Enlarged Axillary Lymph Nodes and Serum Lipids after Bariatric Surgery
Source: MDPI journal article supplement (doi:10.3390/cells11030482), 2022-01-30
Supplement: s1 [file s1]

The supplementary data provided in tables S1 and S2 include data for the entire bariatric surgery cohort that had available screening mammograms before and after surgery, including patients with partially visualized nodes, non-visualized nodes, and normal nodes that were not included in the primary analyses. Table S1 compares BMI and weight before and after bariatric surgery among all groups stratified by lymph node category (Supplementary Table S1). Table S2 provides detailed pre and post-surgical mean cardiometabolic profile of all groups stratified by lymph node category.

Supplementary Table S1. Study population characteristics by subgroup. *p*-values for continuous and categorical variables were calculated by a two-tailed *t*-test and a two-tailed Fisher's exact test, respectively. Missing values (NA) represent measurements of FIN that could not be obtained because the lymph nodes were not fully visible or were normal in size and morphology before and after bariatric surgery.

|                                       | Groups                   |                       |                             |                        |                | <i>p</i> -Value |
|---------------------------------------|--------------------------|-----------------------|-----------------------------|------------------------|----------------|-----------------|
|                                       | No Change in<br>FIN Size | Change in FIN<br>Size | Partially<br>Visualized FIN | No Nodes<br>Visualized | Normal Nodes   |                 |
| <i>n</i>                              | 39                       | 45                    | 40                          | 21                     | 10             |                 |
| Age in years<br>mean(sd)              | 56.26 (7.50)             | 58.40 (7.10)          | 54.62 (8.21)                | 55.00 (7.91)           | 57.20 (13.72)  | 0.259           |
| Lymph node<br>size in mm<br>mean (sd) |                          |                       |                             |                        |                |                 |
| Pre-surgical                          | 20.43 (6.17)             | 26.74 (8.81)          | NA                          | NA                     | NA             | <0.001          |
| Post-surgical                         | 18.65 (6.45)             | 20.37 (7.06)          | NA                          | NA                     | NA             | 0.252           |
| Difference                            | 1.77 (1.15)              | 6.38 (5.06)           | NA                          | NA                     | NA             | <0.001          |
| BMI kg/m <sup>2</sup><br>mean (sd)    |                          |                       |                             |                        |                |                 |
| Pre-surgical                          | 44.20 (7.61)             | 46.55 (8.14)          | 45.61 (5.75)                | 41.83 (5.71)           | 42.65 (6.15)   | 0.087           |
| Post-surgical                         | 34.60 (6.05)             | 34.07 (6.43)          | 32.82 (5.15)                | 32.10 (7.26)           | 33.14 (6.59)   | 0.526           |
| Difference                            | 9.60 (5.30)              | 12.48 (6.14)          | 13.61 (7.15)                | 9.73 (3.70)            | 9.51 (1.75)    | 0.009           |
| Weight in kg<br>mean (sd)             |                          |                       |                             |                        |                |                 |
| Pre-surgical                          | 116.97 (21.09)           | 122.56 (24.02)        | 123.60 (17.85)              | 112.64<br>(16.54)      | 113.88 (16.89) | 0.182           |
| Post-surgical                         | 91.26 (16.93)            | 89.54 (17.24)         | 86.44 (16.33)               | 85.46 (20.22)          | 85.76 (14.61)  | 0.62            |
| Difference                            | 25.71 (14.28)            | 33.02 (16.94)         | 37.16 (23.44)               | 27.19 (8.77)           | 28.12 (6.47)   | 0.031           |

Supplementary Table S2. Detailed cardiometabolic profile of all patients before and after bariatric surgery stratified by fat-infiltrated lymph node category. Body mass index (BMI) in kg/m<sup>2</sup>, BP (blood pressure) in mmHg, HbA1c (hemoglobin A1c) in mg/dL, HDL (high-density lipoprotein) in mg/dL, LDL (low-density lipoprotein) in mg/dL, TG (triglyceride) in mg/dL, and Chol (cholesterol) in mg/dL. *p*-values were calculated by a two-tailed *t*-test.

|                             | Pre-Surgery    | Post-Surgery   | <i>p</i> Value |
|-----------------------------|----------------|----------------|----------------|
| Change in FIN size          |                |                |                |
| <i>n</i>                    | 45             | 45             |                |
| BMI (mean (SD))             | 46.55 (8.14)   | 34.07 (6.43)   | <0.001         |
| Weight (mean (SD))          | 122.56 (24.02) | 89.54 (17.24)  | <0.001         |
| Systolic (mean (SD))        | 141.09 (14.95) | 128.89 (14.91) | <0.001         |
| Diastolic (mean (SD))       | 76.62 (10.82)  | 72.49 (11.37)  | 0.081          |
| Fasting glucose (mean (SD)) | 132.21 (38.88) | 102.38 (19.74) | 0.002          |
| HbA1c (mean (SD))           | 6.62 (1.15)    | 6.27 (1.17)    | 0.228          |

|                             |                 |                |        |
|-----------------------------|-----------------|----------------|--------|
| Chol (mean (SD))            | 198.54 (37.58)  | 187.76 (34.44) | 0.291  |
| HDL (mean (SD))             | 51.62 (16.00)   | 65.96 (18.32)  | 0.004  |
| TG (mean (SD))              | 174.08 (100.07) | 128.72 (68.86) | 0.066  |
| LDL (mean (SD))             | 112.12 (36.14)  | 96.58 (31.37)  | 0.112  |
| No change in FIN            |                 |                |        |
| <i>n</i>                    | 39              | 39             |        |
| BMI (mean (SD))             | 44.20 (7.61)    | 34.60 (6.05)   | <0.001 |
| Weight (mean (SD))          | 116.97 (21.09)  | 91.26 (16.93)  | <0.001 |
| Systolic (mean (SD))        | 138.95 (11.19)  | 127.23 (14.20) | <0.001 |
| Diastolic (mean (SD))       | 77.13 (12.80)   | 70.54 (10.42)  | 0.015  |
| Fasting glucose (mean (SD)) | 125.75 (34.58)  | 107.06 (31.41) | 0.103  |
| Hba1c (mean (SD))           | 6.35 (0.89)     | 5.79 (1.10)    | 0.036  |
| Chol (mean (SD))            | 215.80 (41.54)  | 192.85 (45.22) | 0.103  |
| HDL (mean (SD))             | 49.10 (10.97)   | 58.55 (15.68)  | 0.033  |
| TG (mean (SD))              | 209.30 (107.13) | 132.85 (51.86) | 0.007  |
| LDL (mean (SD))             | 124.45 (38.28)  | 108.55 (41.60) | 0.216  |
| Partially visible FIN       |                 |                |        |
| <i>n</i>                    | 40              | 40             |        |
| BMI (mean (SD))             | 45.61 (5.75)    | 32.82 (5.15)   | <0.001 |
| Weight (mean (SD))          | 123.6 (17.85)   | 86.44 (16.3)   | <0.001 |
| Systolic (mean (SD))        | 133.97 (11.98)  | 126.20 (14.21) | 0.01   |
| Diastolic (mean (SD))       | 75.92 (7.67)    | 68.58 (8.67)   | <0.001 |
| Fasting glucose (mean (SD)) | 112.47 (24.77)  | 98.57 (21.17)  | 0.101  |
| Hba1c (mean (SD))           | 6.23 (1.08)     | 5.88 (0.86)    | 0.258  |
| Chol (mean (SD))            | 195.11 (33.76)  | 177.35 (36.82) | 0.146  |
| HDL (mean (SD))             | 51.94 (14.24)   | 56.71 (13.88)  | 0.324  |
| TG (mean (SD))              | 154.89 (96.80)  | 125.18 (39.45) | 0.248  |
| LDL (mean (SD))             | 113.28 (31.79)  | 95.59 (31.51)  | 0.108  |
| No nodes visible            |                 |                |        |
| <i>n</i>                    | 21              | 21             |        |
| BMI (mean (SD))             | 41.83 (5.71)    | 32.10 (7.26)   | <0.001 |
| Weight (mean (SD))          | 112.64 (16.54)  | 85.45 (20.22)  | <0.001 |
| Systolic (mean (SD))        | 134.48 (13.66)  | 124.00 (15.06) | 0.023  |
| Diastolic (mean (SD))       | 76.00 (10.16)   | 74.14 (9.25)   | 0.539  |
| Fasting glucose (mean (SD)) | 109.91 (20.44)  | 105.67 (36.07) | 0.744  |
| Hba1c (mean (SD))           | 5.85 (0.66)     | 5.43 (0.31)    | 0.093  |
| Chol (mean (SD))            | 189.71 (38.59)  | 188.83 (19.09) | 0.961  |
| HDL (mean (SD))             | 47.14 (10.64)   | 56.33 (12.24)  | 0.175  |
| TG (mean (SD))              | 145.57 (72.55)  | 112.17 (75.90) | 0.435  |
| LDL (mean (SD))             | 115.00 (27.74)  | 110.00 (18.57) | 0.715  |
| Normal nodes visible        |                 |                |        |
| <i>n</i>                    | 10              | 10             |        |
| BMI (mean (SD))             | 42.65 (6.15)    | 33.14 (6.59)   | 0.004  |
| Weight (mean (SD))          | 113.88 (16.89)  | 85.76 (14.61)  | 0.001  |
| Systolic BP (mean (SD))     | 133.60 (13.32)  | 131.90 (14.83) | 0.79   |
| Diastolic BP (mean (SD))    | 71.80 (12.61)   | 73.80 (8.51)   | 0.683  |
| Fasting glucose (mean (SD)) | 88.17 (5.34)    | 92.20 (19.40)  | 0.634  |

|                   |                |                |       |
|-------------------|----------------|----------------|-------|
| Hba1c (mean (SD)) | 5.76 (0.87)    | 5.23 (0.42)    | 0.372 |
| Chol (mean (SD))  | 215.00 (44.98) | 198.67 (33.66) | 0.481 |
| HDL (mean (SD))   | 56.86 (10.65)  | 80.17 (9.54)   | 0.002 |
| TG (mean (SD))    | 151.57 (79.83) | 68.17 (8.13)   | 0.028 |
| LDL (mean (SD))   | 120.33 (31.06) | 105.00 (30.12) | 0.406 |
